1 A seventeenth-century *Mycobacterium tuberculosis* genome supports a Neolithic emergence  
2 of the *Mycobacterium tuberculosis* complex.

3

4 Susanna Sabin<sup>1</sup> (sabin@shh.mpg.de), Alexander Herbig<sup>1</sup> (herbig@shh.mpg.de), Åshild J.

5 Vågane<sup>1</sup> (vagane@shh.mpg.de), Torbjörn Ahlström<sup>2</sup> (torbjorn.ahlstrom@ark.lu.se), Gracijela

6 Bozovic<sup>3</sup> (gracijela.bozovic@med.lu.se), Caroline Arcini<sup>4</sup>

7 (caroline.ahlstrom.arcini@arkeologerna.com), Denise Kühnert<sup>5\*</sup> (kuehnert@shh.mpg.de),

8 Kirsten I. Bos<sup>1\*</sup> (bos@shh.mpg.de)

9 1. Department of Archaeogenetics, Max Planck Institute for the Science of Human  
10 History, Jena, Germany 07745

11 2. Department of Archaeology and Ancient History, Lund University, Lund, Sweden 221  
12 00

13 3. Department of Medical Imaging and Clinical Physiology, Skåne University Hospital  
14 Lund and Lund University, Lund, Sweden 221 00

15 4. Arkeologerna, National Historical Museum, Lund, Sweden 226 60

16 5. Transmission, Infection, Diversification & Evolution Group, Max Planck Institute for  
17 the Science of Human History, Jena, Germany 07745

18 \*Corresponding authors

19

20 Running title: A seventeenth-century *Mycobacterium tuberculosis* genome supports a

21 Neolithic emergence of the *Mycobacterium tuberculosis* complex

22 Keywords: tuberculosis, ancient DNA, *Mycobacterium tuberculosis*, molecular dating,

23 metagenomics

## 24 ABSTRACT

### 25 Background:

26 Although tuberculosis accounts for the highest mortality from a bacterial infection on a global  
27 scale, questions persist regarding its origin. One hypothesis based on modern  
28 *Mycobacterium tuberculosis* complex (MTBC) genomes suggests their most recent common  
29 ancestor (MRCA) followed human migrations out of Africa ~70,000 years before present  
30 (BP). However, studies using ancient genomes as calibration points have yielded much  
31 younger MRCA dates of less than 6,000 years. Here we aim to address this discrepancy  
32 through the analysis of the highest-coverage and highest quality ancient MTBC genome  
33 available to date, reconstructed from a calcified lung nodule of Bishop Peder Winstrup of  
34 Lund (b. 1605 – d. 1697).

### 35 Results:

36 A metagenomic approach for taxonomic classification of whole DNA content permitted the  
37 identification of abundant DNA belonging to the human host and the MTBC, with few non-TB  
38 bacterial taxa comprising the background. Subsequent genomic enrichment enabled the  
39 reconstruction of a 141-fold coverage *M. tuberculosis* genome. In utilizing this high-quality,  
40 high-coverage 17<sup>th</sup> century *M. tuberculosis* genome as a calibration point for dating the  
41 MTBC, we employed multiple Bayesian tree models, including birth-death models, which  
42 allowed us to model pathogen population dynamics and data sampling strategies more  
43 realistically than those based on the coalescent.

### 44 Conclusions

45 The results of our metagenomic analysis demonstrate the unique preservation environment  
46 calcified nodules provide for DNA. Importantly, we estimate an MRCA date for the MTBC of  
47 3683 BP (2253-5821 BP) and for Lineage 4 of 1651 BP (946-2575 BP) using multiple  
48 models, confirming a Neolithic emergence for the MTBC.

## 49 BACKGROUND

50 Tuberculosis, caused by organisms in the *Mycobacterium tuberculosis* complex  
51 (MTBC), has taken on renewed relevance and urgency in the 21<sup>st</sup> century due to its global

52 distribution, its high morbidity, and the rise of antibiotic resistant strains (1). The difficulty in  
53 disease management and treatment, combined with the massive reservoir the pathogen  
54 maintains in human populations through latent infection (2), makes tuberculosis a pressing  
55 public health challenge. Despite this, controversy exists regarding the history of the  
56 relationship between members of the MTBC and their human hosts.

57 Existing literature suggests two most recent common ancestor (MRCA) dates for the  
58 MTBC based on the application of Bayesian molecular dating to genome-wide  
59 *Mycobacterium tuberculosis* data. One estimate suggests the extant MTBC emerged  
60 through a bottleneck approximately 70,000 years ago, coincident with major migrations of  
61 humans out of Africa (3). This estimate was reached using exclusively modern *M.*  
62 *tuberculosis* genomes, with internal nodes of the MTBC calibrated by extrapolated dates for  
63 major human migrations (3). This estimate relied on congruence between the topology of  
64 MTBC and human mitochondrial phylogenies, but this congruence does not extend to  
65 human Y chromosome phylogeographic structure (4). As an alternative approach, the first  
66 publication of ancient MTBC genomes utilized radiocarbon dates as direct calibration points  
67 to infer mutation rates, and yielded an MRCA date for the complex of less than 6,000 years  
68 (5). This younger emergence was later supported by mutation rates estimated within the  
69 pervasive Lineage 4 (L4) of the MTBC, using four *M. tuberculosis* genomes from the late 18<sup>th</sup>  
70 and early 19<sup>th</sup> centuries (6).

71 Despite the agreement in studies that have relied on ancient DNA calibration so far,  
72 dating of the MTBC emergence remains controversial. Such a young age cannot account for  
73 purported detection of MTBC DNA in archaeological material that predates the MRCA  
74 estimate (e.g. Baker et al. 2015; Hershkovitz et al. 2008; Masson et al. 2013; Rothschild et  
75 al. 2001), the authenticity of which has been challenged (11). Furthermore, constancy in  
76 mutation rates of the MTBC has been challenged on account of observed rate variation in  
77 modern lineages, combined with the unquantified effects of latency (12). The ancient  
78 genomes presented by Bos and colleagues, though isolated from human remains, were  
79 most closely related to *Mycobacterium pinnipedii*, a lineage of the MTBC associated with

80 infections in seals and sea lions today (5). Given our unfamiliarity with the demographic  
81 history of tuberculosis in sea mammal populations (13), identical substitution rates between  
82 the pinniped lineage and human-adapted lineages of the MTBC cannot be assumed.  
83 Additionally, the identification of true genetic changes in archaeological specimens can be  
84 difficult given the similarities between MTBC and environmental mycobacterial DNA from the  
85 depositional context (14). Though the ancient genomes published by Kay and colleagues  
86 belonged to human-adapted lineages of the MTBC, and the confounding environmental  
87 signals were significantly reduced by their funerary context in crypts, two of the four  
88 genomes used for molecular dating were derived from mixed-strain infections (6). By  
89 necessity, diversity derived in each genome would have to be ignored for them to be  
90 computationally distinguished (6). Though ancient DNA is a valuable tool for answering the  
91 question of when the MTBC emerged, the available ancient data remains sparse and subject  
92 to case-by-case challenges.

93         Here, we contribute to clarifying the timing of the emergence of the MTBC and L4  
94 using multiple Bayesian models of varying complexity through the analysis of a high-  
95 coverage 17<sup>th</sup> century *M. tuberculosis* genome extracted from a calcified lung nodule.  
96 Removed from naturally mummified remains, the nodule provided an excellent preservation  
97 environment for the pathogen, exhibiting minimal infiltration by exogenous bacteria. The  
98 nodule and surrounding lung tissue also showed exceptional preservation of host DNA, thus  
99 showing promise for this tissue type in ancient DNA investigations.

## 100 RESULTS

### 101 **Pathogen identification**

102         Computed tomography (CT) scans of the mummified remains of Bishop Peder  
103 Winstrup of Lund revealed a calcified granuloma a few millimeters (mm) in size in the  
104 collapsed right lung together with two ~5 mm calcifications in the right hilum (Figure 1).  
105 Primary tuberculosis causes parenchymal changes and ipsilateral hilar lymphadenopathy  
106 that is more common on the right side (15). Upon resolution it can leave a parenchymal scar,  
107 a small calcified granuloma (Ghon Focus), and calcified hilar nodes, which are together

108 called a Ranke complex. In imaging this complex is suggestive of previous tuberculosis  
109 infection, although histoplasmosis can have the same appearance (16). Histoplasmosis,  
110 however, is very rare in Scandinavia and more often seen in other parts of the world (e.g.  
111 the Americas) (17). The imaging findings were therefore considered to result from previous  
112 primary tuberculosis. One of the calcified hilar nodes was extracted from the remains during  
113 video-assisted thoracoscopic surgery, guided by fluoroscopy. The extracted material was  
114 further subsampled for genetic analysis. DNA was extracted from the nodule and  
115 accompanying lung tissue using protocols optimized for the recovery of ancient, chemically  
116 degraded, fragmentary genetic material (18). The metagenomic library was shotgun  
117 sequenced to a depth of approximately 3.7 million reads.

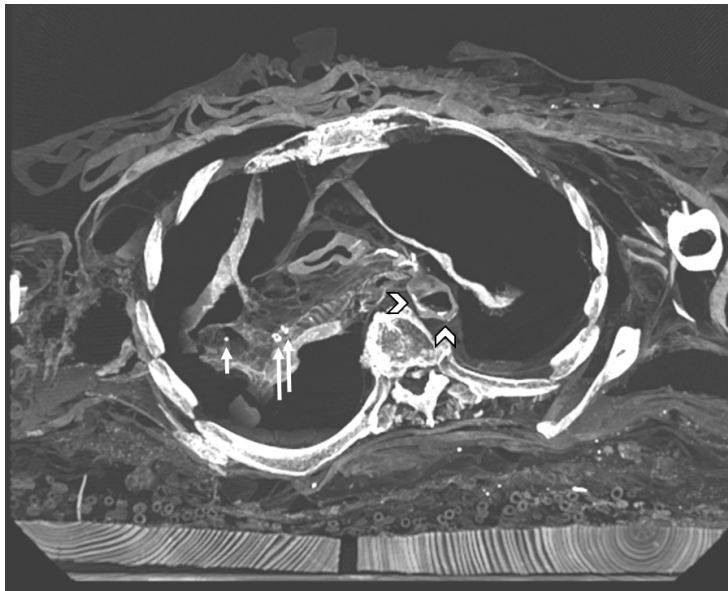

118  
119 **Figure 1. CT image of Ranke complex.** CT image of Peder Winstrup's chest in a slightly  
120 angled axial plane with the short arrow showing a small calcified granuloma in the probable  
121 upper lobe of the collapsed right lung, and two approximately 5 mm calcifications in the right  
122 hilum together suggesting a Ranke complex and previous primary tuberculosis. The more  
123 lateral of the two hilar calcifications was extracted for further analysis. In addition, there are  
124 calcifications in the descending aorta proposing atherosclerosis (arrowhead).  
125

126 Adapter-clipped and base quality filtered reads were taxonomically binned with MALT  
127 (19) against the full NCBI Nucleotide database ('nt', April 2016). In this process, 3,515,715  
128 reads, or 95% of the metagenomic reads, could be assigned to taxa contained within the  
129 database. Visual analysis of the metagenomic profile in MEGAN6 (20) revealed the majority  
130 of these reads, 2,833,403 or 81%, were assigned to *Homo sapiens*. A further 1,724 reads  
131 assigned to the *Mycobacterium tuberculosis* complex (MTBC) node. Importantly, no other  
132 taxa in the genus *Mycobacterium* were identified, and the only other identified bacterial  
133 taxon was *Ralstonia solanacearum* (Figure 2a), a soil-dwelling plant pathogen frequently  
134 identified in metagenomic profiles of archaeological samples (21,22) (Table S1 in Additional  
135 File 1).

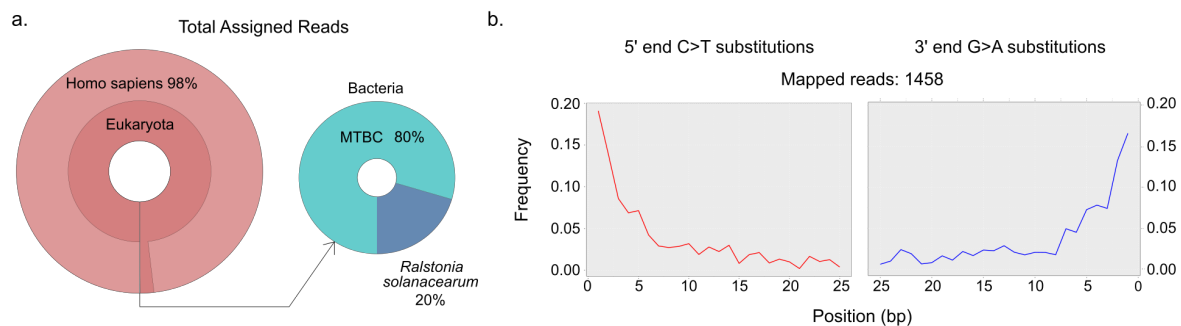

136

137 **Figure 2. Screening of sequencing data from LUND1 shows preservation of host and**

138 **pathogen DNA. A) Krona plots reflecting the metagenomic composition of the lung nodule.**

139 The majority of sequencing reads were aligned to *Homo sapiens* (n=2,833,403),

140 demonstrating extensive preservation of host DNA. A small portion of reads aligned to

141 bacterial organisms, and 80% of these reads were assigned to the MTBC node (n=1,724).

142 B) Damage plots generated from sequencing reads mapped directly to a reconstructed

143 MTBC ancestor genome (23), demonstrating a pattern characteristic of ancient DNA.

144 Pre-processed reads were mapped to both the hg19 human reference genome and a

145 reconstructed MTBC ancestor (TB ancestor) (23) using BWA as implemented in the Efficient

146 Ancient Genome Reconstruction (EAGER) pipeline (24). Reads aligned to hg19 with direct

147 mapping constituted an impressive 88% of the total sequencing data (Table S2 in Additional

148 File 1). Human mitochondrial contamination was extremely low, estimated at only 1-3%

149 using Schmutzi (25) (Additional File 2). Reads were also mapped to the TB ancestor (Table  
150 1). After map quality filtering and read de-duplication, 1,458 reads, or 0.045% of the total  
151 sequencing data, aligned to the reference (Table 1), and exhibited cytosine-to-thymine  
152 damage patterns indicative of authentic ancient DNA (Figure 2b) (26,27). Qualitative  
153 preservation of the tuberculosis DNA was slightly better than that of the human DNA, as the  
154 damage was greater in the latter (Table S2 in Additional File 1). Laboratory-based  
155 contamination, as monitored by negative controls during the extraction and library  
156 preparation processes, could be ruled out as the source of this DNA (Table S3 in Additional  
157 File 1).

### 158 **Genomic enrichment and reconstruction**

159 Due to the clear but low-abundance MTBC signal, a uracil DNA glycosylase (UDG)  
160 library was constructed to remove DNA lesions caused by hydrolytic deamination of cytosine  
161 residues (28) and enriched with an in-solution capture (29,30) designed to target genome-  
162 wide data representing the full diversity of the MTBC (see METHODS). The capture probes  
163 are based on the TB ancestor genome (23), which is equidistant from all lineages of the  
164 MTBC. The enriched library was sequenced using a paired-end, 150-cycle Illumina  
165 sequencing kit to obtain a full fragment-length distribution (Figure S1 in Additional File 2).  
166 The resulting sequencing data was then aligned to the hypothetical TB ancestor genome  
167 (23), and the mapping statistics were compared with those from the screening data to  
168 assess enrichment (Table 1). Enrichment increased the proportion of endogenous MTBC  
169 DNA content by three orders of magnitude, from 0.045% to 45.652%, and deep sequencing  
170 yielded genome-wide data at an average coverage of approximately 141.5-fold. The mapped  
171 reads have an average fragment length of ~66 base pairs (Table 1).

172

| Pre/post            | Library treatment | Processed reads pre-mapping ( <i>n</i> ) | Unique mapped reads, quality-filtered ( <i>n</i> ) | Endogenous DNA (%) | Mean fold coverage | Mean fragment length (bp) | GC content (%) |
|---------------------|-------------------|------------------------------------------|----------------------------------------------------|--------------------|--------------------|---------------------------|----------------|
| <b>Pre-capture</b>  | non-UDG           | 3696712                                  | 1458                                               | 0.045              | 0.018              | 54.31                     | 63.89          |
| <b>Post-capture</b> | UDG               | 59091507                                 | 9482901                                            | 45.652             | 141.5062           | 65.83                     | 62.96          |



173 **Table 1. Mapping statistics for LUND1 libraries.** A comparison of the mapping statistics  
174 for the non-UDG screening library and UDG-treated MTBC enriched library of LUND1 when  
175 aligned to the MTBC ancestor genome (23). For full EAGER output, see Table S2 in  
176 Additional File 1.

177

178 We further evaluated the quality of the reconstructed genome by quantifying the  
179 amount of heterozygous positions (see METHODS). Derived alleles represented by 10-90%  
180 of the reads covering a given position with five or more reads of coverage were counted.  
181 Only 24 heterozygous sites were counted across all variant positions in LUND1. As a  
182 comparison, the other high-coverage (~125 fold) ancient genome included here – body92  
183 from Kay et al. 2015 – contained 70 heterozygous positions.

#### 184 **Phylogeny and dating**

185 Preliminary phylogenetic analysis using neighbor joining (Figures S2 and S3 in  
186 Additional File 2), maximum likelihood (Figures S4 and S5 in Additional File 2), and  
187 maximum parsimony trees (Figures S6 and S7 in Additional File 2) indicated that LUND1  
188 groups within the L4 strain diversity of the MTBC, and more specifically, within the  
189 L4.10/PGG3 sublineage. This sublineage was recently defined by Stucki and colleagues as  
190 the clade containing L4.7, L4.8, and L4.9 (31) according to the widely-accepted Coll  
191 nomenclature (32). Following this, we constructed two datasets to support molecular dating  
192 of the full MTBC (Table S4 in Additional File 1) and L4 of the MTBC (Table S5 in Additional  
193 File 1).

194 The dataset reflecting extant diversity of the MTBC was compiled as reported  
195 elsewhere (5), with six ancient genomes as calibration points. These included LUND1; two  
196 additional ancient genomes, body80 and body92, extracted from late 18<sup>th</sup> and early 19<sup>th</sup>  
197 century Hungarian mummies (6); and three human-isolated *Mycobacterium pinnipedii* strains  
198 from Peru (5), encompassing all available ancient *M. tuberculosis* genomes with sufficient  
199 coverage to call SNPs confidently after stringent mapping with BWA (33) (see METHODS;  
200 Table S4 in Additional File 1). *Mycobacterium canettii* was used as an outgroup. In



201 generating an alignment of variant positions in this dataset, we excluded repetitive regions  
202 and regions at risk of cross-mapping with other organisms as done previously (5), as well as  
203 potentially imported sites from recombination events, which were identified using  
204 ClonalFrameML (34) (Table S6 in Additional File 1). We chose to exclude these potential  
205 recombination events despite *M. tuberculosis* being generally recognized as a largely clonal  
206 organism with minimal recombination or horizontal gene transfer, as this is still a point of  
207 contention (35). Only twenty-three variant sites were lost from the full MTBC alignment as  
208 potential imports. We called a total of 42,856 variable positions in the dataset as aligned to  
209 the TB ancestor genome. After incompletely represented sites were excluded, 11,716 were  
210 carried forward for downstream analysis.

211 To explore the impact of the selected tree prior and clock model, we ran multiple  
212 variations of models as available for use in BEAST2 (36). We first used both a strict and a  
213 relaxed clock model together with a constant coalescent model (CC+strict, CC+UCLD). We  
214 found there to be minimal difference between the inferred rates estimated by the two  
215 models. This finding, in addition to the low rate variance estimated in all models, suggests  
216 there is little rate variation between known branches of the MTBC. Nevertheless, the relaxed  
217 clock appeared to have a slightly better performance (Table 2). To experiment with models  
218 that allowed for dynamic populations, we applied a Bayesian skyline (SKY+UCLD) and birth-  
219 death skyline prior (BDSKY+UCLD) combined with a relaxed clock model. In the  
220 BDSKY+UCLD model, the tree was conditioned on the root. To our knowledge, this is the  
221 first instance of a birth-death tree prior being used to infer evolutionary dynamics of the  
222 MTBC while using ancient data for tip calibration.

223 A calibrated maximum clade credibility (MCC) tree was generated for the  
224 BDSKY+UCLD model, with 3683 years before present (BP) (95% highest posterior density  
225 [95% HPD] interval: 2253 – 5821 BP) as an estimated date of emergence for the MTBC  
226 (Figure 3a). Tree topology agrees with previously presented phylogenetic analyses of the full  
227 MTBC (3,5,37). A birth-death skyline plot illustrates the flux in the effective reproduction  
228 number ( $R$ ) over time (Figure 3b). In an outbreak setting,  $R$  refers to the average number of

229 secondary cases stemming from a single infection, and an epidemic event is inferred when  
 230 the value is greater than one. However, for the data at hand,  $R > 1$  translates to lineage  
 231 diversification rates exceeding lineage death/extinction. Since there is no data representing  
 232 the period between ~1000 years ago and the emergence of the MTBC, there is much  
 233 uncertainty in the related estimates. From around 1300 BP the 95% HPD excludes 1,  
 234 indicating a positive net diversification rate, with a significant increase between 974 and 390  
 235 BP (odds ratio=10.00054).

| Model      | Mean Likelihood | Mean Rate (95% HPD)                    | Mean Rate Variance (95% HPD)              | Mean Tree Height (95% HPD)             |
|------------|-----------------|----------------------------------------|-------------------------------------------|----------------------------------------|
| BDSKY+UCLD | -6123180.475    | 1.303E-8<br>(6.9753E-9,<br>1.8348E-8)  | 1.3656E-17<br>(2.4838E-18,<br>2.5884E-17) | 3683.203<br>(2253.2836,<br>5820.8405)  |
| CC+UCLD    | -6123187.492    | 1.214E-8<br>(7.1934E-9,<br>1.6448E-8)  | 1.2459E-17<br>(2.833E-18,<br>2.3969E-17)  | 4172.1961<br>(2585.2349,<br>6119.744)  |
| SKY+UCLD   | -6123279.053    | 1.3294E-8<br>(8.9335E-9,<br>1.7461E-8) | 1.4147E-17<br>(5.1837E-18,<br>2.4356E-17) | 3540.7193<br>(2453.8322,<br>4829.7259) |
| CC+strict  | -6123688.933    | 1.1573E-8<br>(8.6397E-9,<br>1.4509E-8) | NA                                        | 4453.1162<br>(3330.1516,<br>5619.3974) |

236 **Table 2. Model comparison for full MTBC dataset.** Parameter estimates from four models  
 237 applied to the full MTBC dataset: constant coalescent with uncorrelated lognormal clock  
 238 (CC+UCLD), constant coalescent with strict clock (CC+strict), Bayesian skyline coalescent  
 239 with uncorrelated lognormal clock (SKY+UCLD), and birth-death skyline with uncorrelated  
 240 lognormal clock (BDSKY+UCLD).

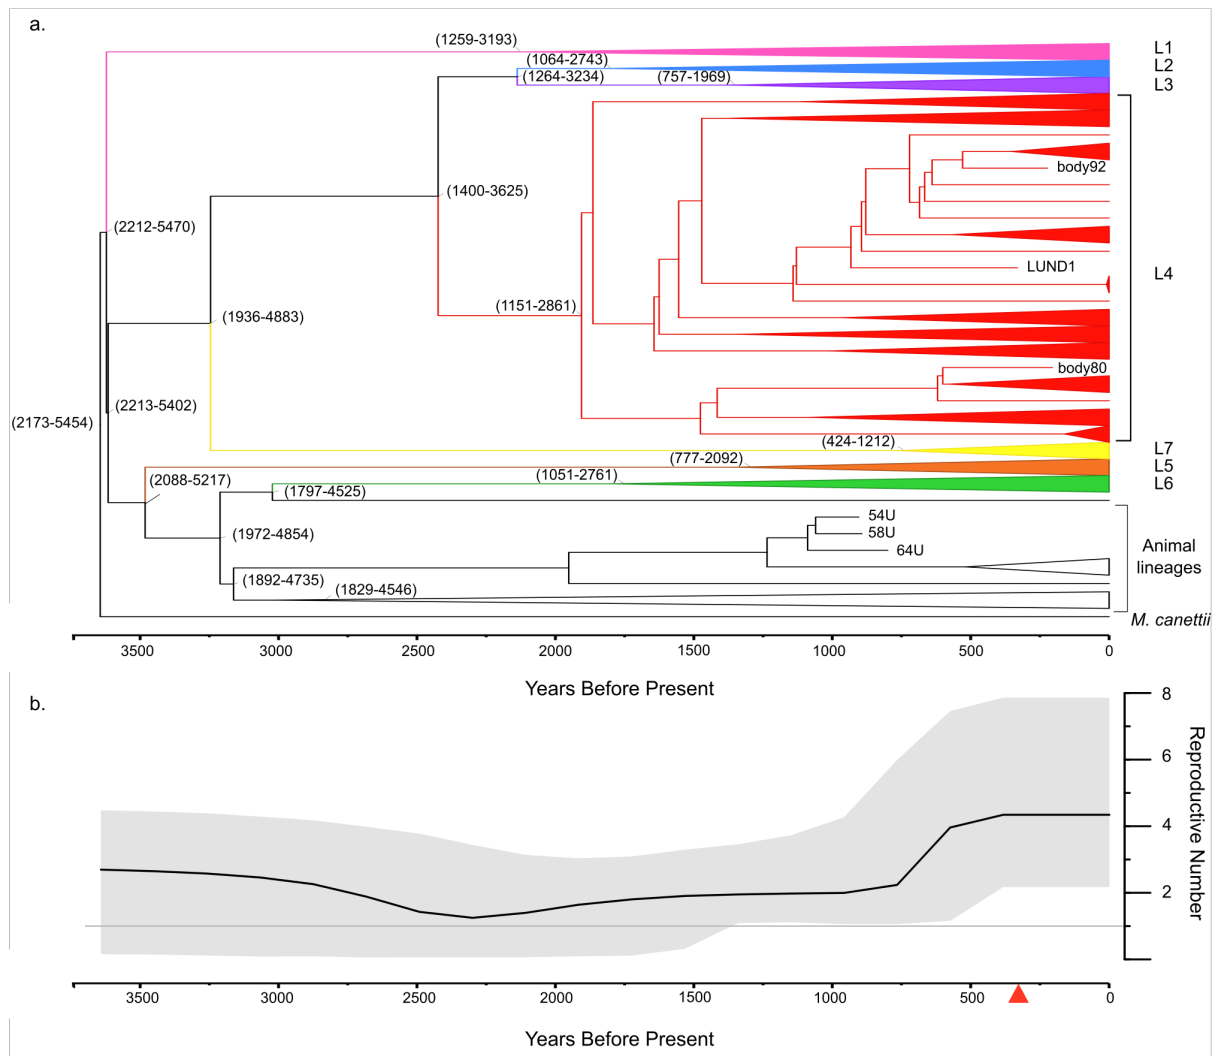

241

242 **Figure 3. MTBC maximum clade credibility tree and birth-death skyline plot.** A) This  
 243 MCC tree of mean heights was generated from the BDSKY+UCLD model as applied to the  
 244 full MTBC dataset. Modern genomes are collapsed according to lineage (labeled on the right  
 245 side). The ancient genomes are labeled with their sample name. The outgroup is labeled as  
 246 “*M. canettii*.” The 95% HPD intervals of selected node heights are indicated as (lower  
 247 boundary - upper boundary) in years before present. The time scale is expressed as years  
 248 before present, with the most recent time as 2010. B) The black line indicates median  
 249 reproductive number over time (reproductive number set to 5 dimensions, see Additional File  
 250 2). The shaded grey area represents the 95% HPD interval of the reproductive number. The  
 251 grey line indicates a reproductive number of 1. The red triangle on the timeline indicates the  
 252 temporal position of LUND1.

253

254           The L4 dataset includes LUND1 and the two Hungarian mummies described above  
255 (6) as calibration points. We selected 149 modern genomes representative of the known  
256 diversity of L4 from previously published datasets (Additional File 2) (3,23,31). A modern  
257 Lineage 2 (L2) genome was used as an outgroup. After the exclusion of sites as discussed  
258 above (Table S7 in Additional File 1), a SNP alignment of these genomes in reference to the  
259 reconstructed TB ancestor genome (23) included a total of 17,333 variant positions,  
260 excluding positions unique to the L2 outgroup. Only fifteen variant sites were lost from the L4  
261 dataset alignment. After sites missing from any alignment in the dataset were excluded from  
262 downstream analysis, 10,009 SNPs remained for phylogenetic inference. A total of 810  
263 SNPs were identified in LUND1, of which 126 were unique to this genome. A SNP effect  
264 analysis (38) was subsequently performed on these derived positions (Additional File 2;  
265 Table S8 in Additional File 1).

266           We applied the same models as described above for the full MTBC dataset, with the  
267 addition of a birth-death skyline model conditioned on the origin of the root  
268 (BDSKY+UCLD+origin). All mean tree heights are within 250 years of each other and the  
269 95% HPD intervals largely overlap. As an informal model comparison, the BDSKY+UCLD  
270 model shows the highest marginal likelihood values. We employed the  
271 BDSKY+UCLD+origin model to determine if the estimated origin of the L4 dataset agreed  
272 with the tree height estimates for the full MTBC dataset. Intriguingly, the estimated origin  
273 parameter (Table 3), or the ancestor of the tree root, largely overlaps with the 95% HPD  
274 range for MTBC tree height as seen in Table 2.

275           A calibrated MCC tree (Figure 4a) was generated based on the BDSKY+UCLD  
276 model for the L4 dataset. This model yielded an estimated date of emergence for L4 of 1650  
277 BP (95% HPD: 946-2575 BP). The tree reflects the ten-sublineage topology presented by  
278 Stucki and colleagues (31), with LUND1 grouping with the L4.10/PGG3 sublineage. A birth-  
279 death skyline plot was also generated (Figure 4b), which is similar to that generated for the

280 MTBC (Figure 3b) inasmuch as the mean R was continuously greater than one in the L4  
 281 population since its emergence.  
 282

| Model             | Mean Likelihood | Mean Rate (95% HPD)                 | Mean Rate Variance (95% HPD)           | Mean Tree Height (95% HPD)         | Origin (BDSKY only)                |
|-------------------|-----------------|-------------------------------------|----------------------------------------|------------------------------------|------------------------------------|
| BDSKY+UCLD        | -6032794.215    | 2.8369E-8<br>(1.4945E-8, 4.0535E-8) | 4.071E-17<br>(5.4068E-18, 7.7999E-17)  | 1650.608<br>(945.7849, 2574.5831)  | NA                                 |
| BDSKY+UCLD+origin | -6032794.987    | 3.1477E-8<br>(2.0046E-8, 4.2189E-8) | 4.5822E-17<br>(9.6022E-18, 8.051E-17)  | 1462.2611<br>(935.6968, 2058.31)   | 3268.341<br>(1102.2144, 8071.0277) |
| CC+UCLD           | -6032797.480    | 3.1068E-8<br>(1.988E-8, 4.1624E-8)  | 4.3865E-17<br>(1.3291E-17, 7.806E-17)  | 1569.0512<br>(1054.607, 2225.4758) | NA                                 |
| SKY+UCLD          | -6032874.480    | 2.8097E-8<br>(1.5329E-8, 3.9927E-8) | 3.7609E-17<br>(6.0593E-18, 7.1919E-17) | 1690.536<br>(1016.2712, 2646.5163) | NA                                 |
| CC+strict         | -6033002.535    | 2.9299E-8<br>(2.2173E-8, 3.6637E-8) | NA                                     | 1567.544<br>(1186.1186, 1978.6488) | NA                                 |

283 **Table 3. Model comparison for L4 dataset.** Selected parameter estimates from five  
 284 models applied to the Lineage 4 dataset: constant coalescent with uncorrelated lognormal  
 285 clock (CC+UCLD), constant coalescent with strict clock (CC+strict), Bayesian skyline  
 286 coalescent with uncorrelated lognormal clock (SKY+UCLD), birth-death skyline with  
 287 uncorrelated lognormal clock and tree conditioned on the root (BDSKY+UCLD), and birth-  
 288 death skyline with uncorrelated lognormal clock with origin parameter estimate  
 289 (BDSKY+UCLD+origin).  
 290

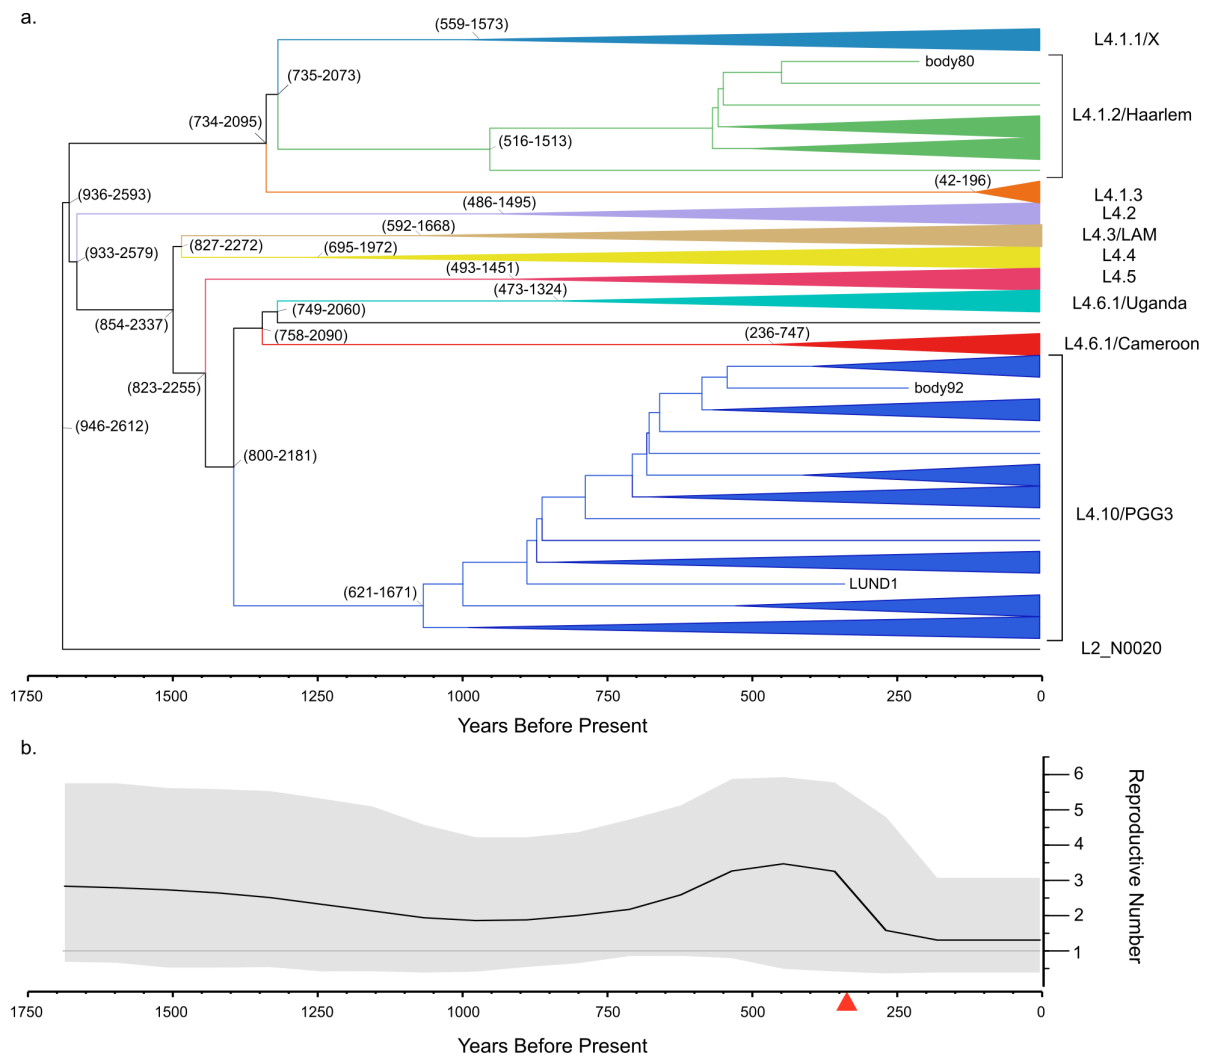

291

292 **Figure 4. L4 maximum clade credibility tree and birth-death skyline plot.** A) This MCC

293 tree of mean heights was generated from the BDSKY+UCLD model as applied to the L4

294 dataset. Modern genomes are collapsed according to sublineage (labeled on the right).

295 The ancient genomes are labeled with their sample name. The Lineage 2 outgroup is

296 labeled as “L2\_N0020.” The 95% HPD interval of selected node heights is indicated as

297 (lower boundary - upper boundary) in years before present. The time scale is expressed as

298 years before present, with the most recent time as 2010. B) The black line indicates median

299 reproductive number over time (reproductive number set to 5 dimensions, see Additional File

300 2). The shaded grey area represents the 95% HPD interval of the reproductive number. The

301 grey line indicates a reproductive number of 1. The red triangle on the timeline indicates the

302 position of LUND1.

303

## 304 DISCUSSION

305         The increasing number of ancient *Mycobacterium tuberculosis* genomes is steadily  
306 reducing the uncertainty of molecular dating estimates for the emergence of the MTBC.  
307 Here, using the ancient data available to date, we directly calibrate the MTBC time tree, and  
308 confirm that known diversity within the complex is derived from a common ancestor that  
309 existed ~2000-6000 years before present (Figure 3; Table 2) (5,6). Our results support the  
310 hypothesis that the MTBC emerged during the Neolithic, and not before. The Neolithic  
311 revolution generally refers to the worldwide transition in lifestyle and subsistence from more  
312 mobile, foraging economies to more sedentary, agricultural economies made possible by the  
313 domestication of plants and animals. The period during which it occurred varies between  
314 regions. In Africa, where the MTBC is thought to have originated (3,39–41), the spread of  
315 animal domestication in the form of pastoralism appears to have its focus around ~3000  
316 BCE, or 5000 BP, across multiple regions (42). The estimates presented here place the  
317 emergence of tuberculosis amidst the suite of human health impacts that took place as a  
318 consequence of the Neolithic lifestyle changes often referred to collectively as the first  
319 epidemiological transition (43,44).

320         Tuberculosis has left testaments to its history as a human pathogen in the  
321 archaeological record (45), and some skeletal evidence has implied the existence of  
322 tuberculosis in humans and animals pre-dating the lower 95% HPD boundary for the MTBC  
323 MRCA presented here (7,8,10,46–50). However, it is important to explore the evolutionary  
324 history of the MTBC through molecular data. Furthermore, it is crucial to base molecular  
325 dating estimates on datasets that include ancient genomes, which expand the temporal  
326 sampling window and provide data from the pre-antibiotic era. Numerous studies have found  
327 long-term nucleotide substitution rate estimates in eukaryotes and viruses to be dependent  
328 on the temporal breadth of the sampling window, and it is reasonable to assume the same  
329 principle applies to bacteria (51–56). Additionally, rate variation over time and between  
330 lineages, which may arise due to changing evolutionary dynamics such as climate and host



331 biology, can impact the constancy of the molecular clock (54,55). Though models have been  
332 developed to accommodate uncertainty regarding these dynamics (57), temporally  
333 structured populations can provide evidence and context for these phenomena over time  
334 and can aid researchers in refining models appropriate for the taxon in question (56).

335 In addition to our MRCA estimate for the MTBC, we present one for L4, which is  
336 among the most globally dominant lineages in the complex (31,58). Our analyses yielded  
337 MRCA dates between ~1000-2500 years before present, as extrapolated from the 95% HPD  
338 intervals of all models (Table 3), with the mean dates spanning from 320-548 CE. These  
339 results are strikingly similar to those found in two prior publications, and support the idea  
340 proposed by Kay and colleagues that L4 may have emerged during the late Roman period  
341 (5,6). However, there exist discrepancies between different estimates for the age of this  
342 lineage in available literature that touch the upper (37) and lower (58) edges of the 95%  
343 HPD intervals reported here. In addition, recent phylogeographic analyses of the MTBC and  
344 its lineages had ambiguous results for L4, with the internal nodes being assigned to either  
345 African or European origins depending on the study or different dataset structures used  
346 within the same study (37,58). Despite the ambiguity, this finding belies a close relationship  
347 between ancestral L4 strains in Europe and Africa (37,58). Stucki and colleagues delineated  
348 L4 into globally distributed “generalist” sublineages and highly local “specialist” sublineages  
349 that do not appear outside a restricted geographical niche (31). Thus far, the specialist  
350 sublineages are limited to the African continent; however, a clear phylogenetic relationship  
351 explaining the distinction between geographically expansive and limited strains has not been  
352 established. Specifically, LUND1 falls within the globally distributed, “generalist” L4.10/PGG3  
353 sublineage that shares a clade with two specialist sublineages: L4.6.1/Uganda and  
354 L4.6.2/Cameroon (Figure 4) (31). In the BDSKY+UCLD model presented here, the ancestral  
355 node for this clade dates to approximately 1372 years BP. At this extrapolated time, an  
356 ancestral strain underwent an evolutionary event in which some descendant lineages  
357 acquired or lost a feature that equipped them to expand past limited host niches into  
358 Eurasia. Confirming and elucidating this phenomenon could offer relevant clues regarding

359 the evolutionary relationship between populations of MTBC organisms and humans.  
360 However, the current discrepancies over the age and geographic origin of L4 make  
361 interpretations of existing data unreliable for this purpose. These discrepancies could be due  
362 to differences in genome selection, SNP selection, and/or model selection and  
363 parameterization. Until more diverse, high-quality ancient L4 genomes are generated,  
364 creating a more temporally and geographically structured dataset, it is unlikely we will gain  
365 clarity.

366         Going deeper into comparisons between the results presented here and those from  
367 prior studies, mutation rate estimates in the L4 and full MTBC analyses were lower than  
368 previous estimates for comparable datasets, but within the same order of magnitude, with all  
369 mean and median estimates ranging between  $1E-8$  and  $5E-8$  (5,6) (Table 2). Nucleotide  
370 substitution rates inferred based on modern tuberculosis data are close to, but slightly higher  
371 than those based on ancient calibration, with multiple studies finding rates of approximately  
372  $1E-7$  substitutions per site per year in multiple studies (4,59). Despite a strict clock model  
373 having been rejected by the MEGA-CC molecular clock test (60) for both the L4 and full  
374 MTBC datasets, the clock rate variation estimates do not surpass  $9E-17$  in any model.  
375 Additionally, there is little difference between the clock rates estimated in the L4 and full  
376 MTBC datasets suggesting the rate of evolution in L4 does not meaningfully differ from that  
377 of the full complex (Tables 2 and 3; Figure 5; Figures S9 and S10 in Additional File 2).

378         Another parameter explored here is R over time for the MTBC and L4 (Figures 2b  
379 and 3b). For both datasets, we see an increase in R at approximately 750 BP. In the MTBC  
380 model, it increases sharply and maintains its peak between 4 and 5. The increase is more  
381 gradual in the L4 model, and declines to hovering just above  $R=1$ . This roughly coincides  
382 with a jump in effective population size estimated by Liu and colleagues for MTBC lineages  
383 indigenous to China (61). The decline of R for L4 beginning approximately 350 BP appears  
384 surprising, given the historically recorded rise of the White Plague in Europe from the 17<sup>th</sup>-  
385 19<sup>th</sup> century (62). However, this is likely due to the reduced sampling of modern sequences,

386 which enabled the dating of the entire L4 lineage. A thorough phylodynamic analysis  
387 requires inclusion of “outbreak samples” only (63) and shall be explored in future work.

388         Importantly, we explored our data through multiple models, including birth-death tree  
389 priors. In our opinion, these models offer more robust parameterization options for  
390 heterochronous datasets that are unevenly distributed over time, such as those presented  
391 here, by allowing for uneven sampling proportions across different time intervals of the tree  
392 (64). Recent studies have demonstrated the importance of selecting appropriate tree priors  
393 for the population under investigation, as well as the differences between birth-death and  
394 coalescent tree priors (65,66). It is notable that the estimates reported here roughly agree  
395 across multiple demographic and clock models implemented in BEAST2. The estimate of  
396 the origin height for the L4 dataset as calculated with the birth-death Skyline model overlaps  
397 with the 95% HPD intervals for the tree height estimates across models in the full MTBC  
398 dataset.

399         In addition to confirming the findings of prior publications, this study contributes a  
400 high-coverage, contamination-free, and securely dated ancient *M. tuberculosis* genome for  
401 future dating efforts, which may include more ancient data or more realistic models. Much of  
402 this quality likely comes from the unique preservation environment of the calcified nodule. In  
403 the case of tuberculosis, such nodules form from host immunological responses in the  
404 waning period of an active pulmonary infection and remain in lung tissue, characterizing the  
405 latent form of the disease. Host immune cells were likely responsible for the dominant signal  
406 of 89% human DNA in the LUND1 metagenomic screening library. Similar levels of  
407 preservation have been observed through analyses of ancient nodules yielding *Brucella*  
408 (Kay et al, 2014) and urogenital bacterial infections (DeVault et al, 2017), with pathogen  
409 preservation rivaling what we report here.

410         LUND1 avoided multiple quality-related problems often encountered in the  
411 identification and reconstruction of ancient genetic data from the MTBC. The genome is of  
412 high quality both in terms of its high coverage and low heterozygosity. Despite the low  
413 quantity of MTBC DNA detected in the preliminary screening data, in-solution capture

414 enriched the proportion of endogenous DNA by three orders of magnitude (Table 1). The  
415 resultant genomic coverage left few ambiguous positions at which multiple alleles were  
416 represented by greater than 10% of the aligned reads. This extremely low level of  
417 heterozygosity indicated that LUND1 contained a dominant signal of only one MTBC strain.  
418 This circumvented analytical complications that can arise from the simultaneous presence of  
419 multiple MTBC strains associated with mixed infections, or from the presence of abundant  
420 non-MTBC mycobacteria stemming from the environment. The preservation conditions of  
421 Bishop Winstrup's remains, mummified in a crypt far from soil, left the small MTBC signal  
422 unobscured by environmental mycobacteria or by the dominance of any other bacterial  
423 organisms (Figure 2a). The unprecedented quality of LUND1 and the precision of its  
424 calibration point (historically recorded year of death) made it ideal for Bayesian molecular  
425 dating applications.  
426

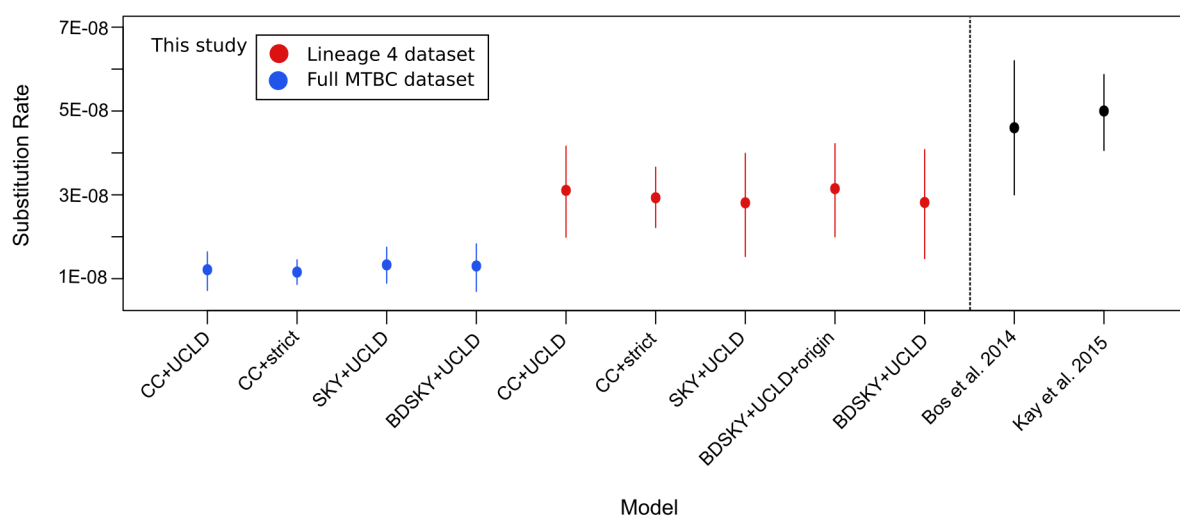

427  
428 **Figure 5. Substitution rate comparison across models and studies.** Mean substitution  
429 rate per site per year for all models is expressed by a filled circle, with extended lines  
430 indicating the 95% HPD interval for that parameter. The Bos et al. 2014 and Kay et al. 2015  
431 ranges are based on the reported rate values in each study. The Bos et al. 2014 range is  
432 based on a full MTBC dataset, while the Kay et al. 2015 range is based on an L4 dataset. All  
433 values presented here fall within one order of magnitude.

434

435           As the practice of applying ancient genomic data is still in its nascent stages, there  
436 are caveats to the results of this study. First, this analysis excludes *M. canettii* – a bacterium  
437 that can cause pulmonary tuberculosis – from the MTBC dataset, and as such our estimate  
438 does not preclude the possibility of a closely related ancestor having caused tuberculosis-  
439 like infections in humans before 6,000 BP. The inferred MRCA could be restricted to a  
440 lineage that survived an evolutionary bottleneck, possibly connected to its virulence in  
441 humans as suggested elsewhere, albeit as a considerably more ancient event (67,68).  
442 Additionally, despite the use of ancient data, our temporal sampling window is still narrow  
443 given the estimated age of the MTBC and L4. For the MTBC dataset no samples pre-date  
444 1,000 years before present, and for L4, no samples predate 350 years before present. It  
445 could be argued the ancient L4 genomes available to date represent samples taken in the  
446 midst of an epidemic – namely, the “White Plague” of tuberculosis, which afflicted Europe  
447 between the 17<sup>th</sup> and 19<sup>th</sup> centuries (62). For a slow-evolving bacterial pathogen like  
448 tuberculosis, it is possible our sampling window of ancient genomes is subject to the very  
449 issue they are meant to alleviate: the time-dependency of molecular clocks (51,53–55). The  
450 genomes sampled from pre-contact Peruvian remains do not derive from a known epidemic  
451 period in history and add temporal spread to our MTBC dataset. However, their membership  
452 to a clade of animal-associated strains (*M. pinnipedii*) indicates they were subject to  
453 dramatically different evolutionary pressures compared to the human-associated lineages of  
454 the complex due to differing host biology and population dynamics. On a related matter, the  
455 available ancient MTBC genomes also suffer from a lack of lineage diversity, with only  
456 pinniped strains and L4 represented.

457           Filling the MTBC time tree with more ancient genomes from diverse time periods,  
458 locations, and lineages would address the limitations listed above. The most informative  
459 data would a) derive from an Old World context (i.e. Europe, Asia, or Africa) pre-dating the  
460 White Plague in Europe or b) come from any geographical location or pre-modern time  
461 period, but belong to one of the MTBC lineages not yet represented by ancient data. An

462 ideal data point, which would clarify many open questions and seeming contradictions  
463 related to the evolutionary history of the MTBC, would derive from Africa, the inferred home  
464 of the MTBC ancestor (3,39–41), and pre-date 2,000 years before present. A genome of this  
465 age would test the lower boundaries of the 95% HPD tree height intervals estimated in the  
466 full MTBC models presented here. Until recently it would have been considered unrealistic to  
467 expect such data to be generated from that time period and location. Innovations and  
468 improvements in ancient DNA retrieval and enrichment methods, however, have brought this  
469 expectation firmly into the realm of the possible (30,69). Ancient bacterial pathogen  
470 genomes have now been retrieved from remains from up to 5,000 years before present (70–  
471 72) and recent studies have reported the recovery of human genomes from up to 15,000  
472 year-old remains from north Africa (73,74).

## 473 CONCLUSIONS

474 Here we offer confirmation that the extant MTBC, and all available ancient MTBC  
475 genomes, stem from a common ancestor that existed a maximum of 6,000 years before  
476 present. Many open questions remain, however, regarding the evolutionary history of the  
477 MTBC and its constituent lineages, as well as the role of tuberculosis in human history.  
478 Elucidating these questions is an iterative process, and progress will include the generation  
479 of diverse ancient *M. tuberculosis* genomes, and the refinement and improved  
480 parameterization of Bayesian models that reflect the realities of MTBC (and other  
481 organisms') population dynamics and sampling frequencies over time. To aid in future  
482 attempts to answer these questions, this study provides an ancient MTBC genome of  
483 impeccable quality and explores the first steps in applying birth-death population models to  
484 modern and ancient TB data.

## 485 METHODS

### 486 **Lung nodule identification**

487 The paleopathological investigation of the body of Winstrup is based on extensive  
488 CT-scan examinations with imaging of the mummy and its bedding performed with a  
489 Siemens Somatom Definition Flash, 128 slice at the Imaging Department of Lund University

490 Hospital. Ocular inspection of the body other than of the head and hands was not feasible,  
491 since Winstrup was buried in his episcopal robes and underneath the body was wrapped in  
492 linen strips. The velvet cap and the leather gloves were removed during the  
493 investigation. The body was naturally mummified and appeared to be well preserved with  
494 several internal organs identified.

495 The imaging was quite revealing. The intracranial content was lost with remains of  
496 the brain in the posterior skull base. Further, the dental status was poor with several teeth in  
497 the upper jaw affected by severe attrition, caries and signs of tooth decay, as well as the  
498 absence of all teeth in the lower jaw. Most of the shed teeth were represented by closed  
499 alveoli, indicating antemortem tooth loss. Along with the investigation of the bedding, a small  
500 sack made of fabric was found behind the right elbow containing five teeth: two incisors, two  
501 premolars and one molar. The teeth in the bag complemented the remaining teeth in the  
502 upper jaw. It is feasible that the teeth belonged to Winstrup and were shed several years  
503 before he died. A fetus approximately five months of age was also found in the bedding,  
504 underneath his feet.

505 Both lungs were preserved but collapsed with findings of a small parenchymal  
506 calcification and two ~5 mm calcifications in the right hilum (Figure 1). The assessment was  
507 that these could constitute a Ranke complex, suggestive of previous primary tuberculosis. A  
508 laparoscopy was performed at the Lund University Hospital in a clinical environment  
509 whereby the nodules were retrieved. Furthermore, several calcifications were also found in  
510 the aorta and the coronary arteries, suggesting the presence of atherosclerosis. The  
511 stomach, liver and gall bladder were preserved, and several small gallstones were observed.  
512 The spleen could be identified but not the kidneys. The intestines were there, however,  
513 collapsed except for the rectum that contained several large pieces of concretions. The  
514 bladder and the prostate could not be recognized.

515 The skeleton showed several pathological changes. Findings on the vertebrae  
516 consistent with of DISH (Diffuse idiopathic skeletal hyperostosis) were present in the  
517 thoracic and the lumbar spine. Reduction of the joint space in both hip joints and the left



518 knee joint indicate that Winstrup was affected by osteoarthritis. No signs of gout or  
519 osteological tuberculosis (i.e. Pott's disease) were found.

520 Neither written sources nor the modern examination of the body of Winstrup reveal  
521 the immediate cause of death. However, it is known that he was bedridden for at least two  
522 years preceding his death. Historical records indicate that gallstones caused him problems  
523 while travelling to his different parishes. Additionally, he was known to have suffered from  
524 tuberculosis as a child, which may have recurred in his old age.

### 525 **Sampling and extraction**

526 Sampling of the lung nodule, extraction, and library preparation were conducted in  
527 dedicated ancient DNA clean rooms at the Max Planck Institute for the Science of Human  
528 History in Jena, Germany. The nodule was broken using a hammer, and a 5.5 mg portion of  
529 the nodule was taken with lung tissue for extraction according to a previously described  
530 protocol with modifications (18). The sample was first decalcified overnight at room  
531 temperature in 1 mL of 0.5 M EDTA. The sample was then spun down, and the EDTA  
532 supernatant was removed and frozen. The partially decalcified nodule was then immersed in  
533 1 mL of a digestion buffer with final concentrations of 0.45 M EDTA and 0.25 mg/mL  
534 Proteinase K (Qiagen) and rotated at 37°C overnight. After incubation, the sample was  
535 centrifuged. The supernatants from the digestion and initial decalcification step were purified  
536 using a 5 M guanidine-hydrochloride binding buffer with a High Pure Viral Nucleic Acid Large  
537 Volume kit (Roche). The extract was eluted in 100 µl of a 10mM tris-hydrochloride, 1 mM  
538 EDTA (pH 8.0), and 0.05% Tween-20 buffer (TET). Two negative controls and one positive  
539 control sample of cave bear bone powder were processed alongside LUND1 to control for  
540 reagent/laboratory contamination and process efficiency, respectively.

### 541 **Library preparation and shotgun screening sequencing**

542 Double-stranded Illumina libraries were constructed according to an established  
543 protocol with some modifications (75). Overhangs of DNA fragments were blunt-end  
544 repaired in a 50 µl reaction including 10 µl of the LUND1 extract, 21.6 µl of H<sub>2</sub>O, 5 µl of NEB  
545 Buffer 2 (New England Biolabs), 2 µl dNTP mix (2.5 mM), 4 µl BSA (10 mg/ml), 5 µl ATP (10

546 mM), 2  $\mu$ l T4 polynucleotide kinase, and 0.4  $\mu$ l T4 polymerase, then purified and eluted in 18  
547  $\mu$ l TET. Illumina adapters were ligated to the blunt-end fragments in a reaction with 20  $\mu$ l  
548 Quick Ligase Buffer, 1  $\mu$ l of adapter mix (0.25  $\mu$ M), and 1  $\mu$ l of Quick Ligase. Purification of  
549 the blunt-end repair and adapter ligation steps was performed using MinElute columns  
550 (Qiagen). Adapter fill-in was performed in a 40  $\mu$ l reaction including 20  $\mu$ l adapter ligation  
551 eluate, 12  $\mu$ l H<sub>2</sub>O, 4  $\mu$ l Thermopol buffer, 2  $\mu$ l dNTP mix (2.5 mM), and 2  $\mu$ l Bst polymerase.  
552 After the reaction was incubated at 37°C for 20 minutes, the enzyme was heat deactivated  
553 with a 20 minute incubation at 80°C. Four library blanks were processed alongside LUND1  
554 to control for reagent/laboratory contamination. The library was quantified using a real-time  
555 qPCR assay (Lightcycler 480 Roche) with the universal Illumina adapter sequences IS7 and  
556 IS8 as targets. Following this step, the library was double indexed (76) with a unique pair of  
557 indices over two 100  $\mu$ l reactions using 19  $\mu$ l of template, 63.5  $\mu$ l of H<sub>2</sub>O, 10  $\mu$ l PfuTurbo  
558 buffer, 1  $\mu$ l PfuTurbo (Agilent), 1  $\mu$ l dNTP mix (25mM), 1.5  $\mu$ l BSA (10 mg/ml), and 2  $\mu$ l of  
559 each indexing primer (10  $\mu$ M). The master mix was prepared in a pre-PCR clean room and  
560 transported to a separate lab for amplification. The two reactions were purified and eluted in  
561 25  $\mu$ l of TET each over MinElute columns (Qiagen), then assessed for efficiency using a  
562 real-time qPCR assay targeting the IS5 and IS6 sequences in the indexing primers. The  
563 reactions were then pooled into one double-indexed library. Approximately one-third of the  
564 library was amplified over three 70  $\mu$ l PCR reactions using 5  $\mu$ l of template each and  
565 Herculase II Fusion DNA Polymerase (Agilent). The products were MinElute purified, pooled,  
566 and quantified using an Agilent Tape Station D1000 Screen Tape kit. LUND1 and the  
567 corresponding negative controls were sequenced separately on an Illumina NextSeq 500  
568 using single-end, 75-cycle, high-output kits.

### 569 **Pathogen identification and authentication**

570 De-multiplexed sequencing reads belonging to LUND1 were processed *in silico* with  
571 the EAGER pipeline (v.1.92) (24). ClipAndMerge was used for adapter removal, fragment  
572 length filtering (minimum sequence length: 30 bp), and base sequence quality filtering  
573 (minimum base quality: 20). MALT v. 038 (19) was used to screen the metagenomic data for

574 pathogens using the full NCBI Nucleotide database ('nt', April 2016) with a minimum percent  
575 identity of 85%, a minSupport threshold of 0.01, and a topPercent value of 1.0. The resulting  
576 metagenomic profile was visually assessed with MEGAN6 CE (20). The adapter-clipped  
577 reads were additionally aligned to a reconstructed MTBC ancestor genome (23) with BWA  
578 (33) as implemented in EAGER (-l 1000, -n 0.01, -q 30). Damage was characterized with  
579 DamageProfiler in EAGER (77).

#### 580 **In-solution capture probe design**

581 Single-stranded probes for in-solution capture were designed using a computationally  
582 extrapolated ancestral genome of the MTBC (23). The probes are 52 nucleotides in length  
583 with a tiling density of 5 nucleotides, yielding a set of 852,164 unique probes after the  
584 removal of duplicate and low complexity probes. The number of probes was raised to  
585 980,000 by a random sampling among the generated probe sequences. A linker sequence  
586 (5'-CACTGCGG-3') was attached to each probe sequence, resulting in probes of 60  
587 nucleotides in length, which were printed on a custom-design 1 million-feature array  
588 (Agilent). The printed probes were cleaved off the array, biotinylated and prepared for  
589 capture according to Fu et al. (30).

#### 590 **UDG library preparation and in-solution capture**

591 Fifty microliters of the original LUND1 extract were used to create a uracil-DNA  
592 glycosylase (UDG) treated library, in which the post-mortem cytosine to uracil modifications,  
593 which cause characteristic damage patterns in ancient DNA, are removed. The template  
594 DNA was treated in a buffer including 7  $\mu$ l H<sub>2</sub>O, 10  $\mu$ l NEB Buffer 2 (New England Biolabs),  
595 12  $\mu$ l dNTP mix (2.5 mM), 1  $\mu$ l BSA (10 mg/ml), 10  $\mu$ l ATP (10 mM), 4  $\mu$ l T4 polynucleotide  
596 kinase, and 6  $\mu$ l USER enzyme (New England Biolabs). The reaction was incubated at 37°C  
597 for three hours, then 4  $\mu$ l of T4 polymerase was added to the library to complete the blunt-  
598 end repair step. The remainder of the library preparation protocol, including double indexing,  
599 was performed as described above.

600 The LUND1 UDG-treated library was amplified over two rounds of amplification using  
601 Herculase II Fusion DNA Polymerase (Agilent). In the first round, five reactions using 3  $\mu$ l of

602 template each were MinElute purified and pooled together. The second round of  
603 amplification consisted of three reactions using 3  $\mu$ l of template each from the first  
604 amplification pool. The resulting products were MinElute purified and pooled together. The  
605 final concentration of 279 ng/ $\mu$ l was measured using an Agilent Tape Station D1000 Screen  
606 Tape kit (Agilent). A portion of the non-UDG library (see above) was re-amplified to 215  
607 ng/ $\mu$ l. A 1:10 pool of the non-UDG and UDG amplification products was made to undergo  
608 capture. A pool of all associated negative control libraries (Supplementary Table 2) and a  
609 positive control known to contain *M. tuberculosis* DNA also underwent capture in parallel  
610 with the LUND1 libraries. Capture was performed according to an established protocol (29),  
611 and the sample product was sequenced on an Illumina HiSeq 4000 with a 150-cycle paired  
612 end kit to a depth of ~60 million paired reads. The blanks were sequenced on a NextSeq  
613 500 with a 75-cycle paired end kit.

#### 614 **Genomic reconstruction, heterozygosity, and SNP calling**

615 For the enriched, UDG-treated LUND1 sequencing data, de-multiplexed paired-end  
616 reads were processed with the EAGER pipeline (v. 1.92) (24), adapter-clipped with  
617 AdapterRemoval, and aligned to the MTBC reconstructed ancestor genome with in-pipeline  
618 BWA (-l 32, -n 0.1, -q 37). Previously published ancient and modern *Mycobacterium*  
619 *tuberculosis* genomic data (Supplementary Table 4, Supplementary Table 5) were  
620 processed as single-end sequencing reads, but otherwise processed identically in the  
621 EAGER pipeline. Genome Analysis Toolkit (GATK) UnifiedGenotyper was used to call SNPs  
622 using default parameters and the EMIT ALL SITES output option (78). We used  
623 MultiVCFAnalyzer (v0.87 <https://github.com/alexherbig/MultiVCFAnalyzer>) (5) to create and  
624 curate SNP alignments for the L4 (Supplementary Table 5) and full MTBC (Supplementary  
625 Table 4) datasets based on SNPs called in reference to the TB ancestor genome (23), with  
626 repetitive sequences, regions subject to cross-species mapping, and potentially imported  
627 sites excluded. The repetitive and possibly cross-mapped regions were excluded as  
628 described previously (5). Potentially imported sites were identified using ClonalFrameML  
629 (34) separately for each dataset, using full genomic alignments and trees generated in

630 RAxML (79) as input without the respective outgroups. Remaining variants were called as  
631 homozygous if they were covered by at least 5 reads, had a minimum genotyping quality of  
632 30, and constituted at least 90% of the alleles present at the site. Outgroups for each  
633 dataset were included in the SNP alignments, but no variants unique to the selected  
634 outgroup genomes were included. Minority alleles constituting over 10% were called and  
635 assessed for LUND1 to check for a multiple strain *M. tuberculosis* infection. Sites with  
636 missing or incomplete data were excluded from further analysis.

### 637 **Phylogenetic analysis**

638 Maximum likelihood, maximum parsimony, and neighbor joining trees were  
639 generated for the L4 and full MTBC datasets (Tables S4 and S5 in Additional File 1), with  
640 500 bootstrap replications per tree. Maximum parsimony and neighbor joining trees were  
641 configured using MEGA-Proto and executed using MEGA-CC (60). Maximum likelihood  
642 trees were configured and executed using RAxML (79) with the GTR+GAMMA substitution  
643 model.

### 644 **Bayesian phylogenetic analysis of full MTBC and L4 datasets**

645 Bayesian phylogenetic analysis of the full MTBC was conducted using a dataset of  
646 261 *M. tuberculosis* genomes including LUND1, five previously published ancient genomes  
647 (5,6), and 255 previously published modern genomes (Table S4 in Additional File 1).  
648 *Mycobacterium canettii* was used as an outgroup for this dataset. Bayesian phylogenetic  
649 analysis of L4 of the MTBC was conducted using a dataset of 152 genomes including three  
650 ancient genomes presented here and in a previous publication (6) and 149 previously  
651 published modern genomes (Table S5 in Additional File 1). Body80 and body92 were  
652 selected out of the eight samples presented by Kay and colleagues based on multiple  
653 criteria. Multiple samples from that study proved to be mixed strain infections. Apart from  
654 body92, these samples were excluded from this analysis due to our present inability to  
655 separate strains without ignoring derived positions. Body92 had a clearly dominant strain  
656 estimated by Kay et al. (6) to make up 96% of the tuberculosis data, and stringent mapping  
657 in BWA (33) (-l 32, -n 0.1, -q 37) found the genome to have 124-fold coverage when mapped

658 against the TB ancestor. Between the degree of dominance and the high coverage, we  
659 could confidently call variant positions from the dominant strain (Figure S8a in Additional File  
660 2). Body80 was the only single-strain sample from that collection to have sufficient coverage  
661 (~8x) for confident SNP calling after stringent mapping (Figure S8b in Additional File 2). For  
662 selection criteria for the modern genomes, please see Additional File 2. L2\_N0020 was used  
663 as an outgroup. The possibility of equal evolutionary rates in both datasets was rejected by  
664 the MEGA-CC molecular clock test (60). TempEst (80) was also used to assess temporal  
665 structure in the phylogeny prior to analysis with BEAST2 (36) (full MTBC  $R^2=0.273$ ; L4  
666  $R^2=0.113$ ).

667 A correction for static positions in the *M. tuberculosis* genome not included in the  
668 SNP alignment was included in the configuration file. A “TVM” substitution model, selected  
669 based on results from ModelGenerator (81), was implemented in BEAUti as a GTR+G4  
670 model with the AG rate parameter fixed to 1.0. LUND1, body80, and body92 were tip-  
671 calibrated using year of death, which was available for all three individuals (Table S5 in  
672 Additional File 1). The three ancient Peruvian genomes were calibrated using the mid-point  
673 of their OxCal ranges (Table S4 in Additional File 1) (5). We performed tip sampling for all  
674 modern genomes excluding the outgroup over a uniform distribution between 1992 and 2010  
675 for all but the BDSKY models for both datasets. The outgroup was fixed to 2010 in every  
676 case. In the BDSKY models, all modern genomes were given a tip date of 2010. All tree  
677 priors were used in conjunction with an uncorrelated relaxed lognormal clock model. The  
678 constant coalescent model was also used in conjunction with a strict clock model.

679 Two independent MCMC chains of 200,000,000 iterations minimum were computed  
680 for each model. If the ESS for any parameter was below 200 after the chains were  
681 combined, they were resumed with additional iterations. The results were assessed in  
682 Tracer v1.7.1 with a 10 percent burn-in (82). Trees were sampled every 20,000 iterations.  
683 The log files and trees for each pair of runs were combined using LogCombiner v2.4.7 (36).  
684 An MCC tree was generated using TreeAnnotator with ten percent burn-in (36). For details  
685 on the parameterization of the birth-death models, please see Additional File 2.

686

687 **DECLARATIONS**

688 **Ethics approval and consent to participate**

689 Not applicable

690 **Consent for publication**

691 Not applicable

692 **Availability of data and material**

693 Raw sequencing data from the non-UDG, non-enriched screening library and the UDG-  
694 treated, enriched library can be found under the BioProject PRJNA517266.

695 **Competing interests**

696 Not applicable

697 **Funding**

698 This project was supported by the Max Planck Society and by grants from the Erik Philip-  
699 Sørensen Foundation and Crafoord foundation to T.A. and C.A.

700 **Authors' contributions**

701 C.A. and K.I.B. conceived of the investigation. S.S., D.K., A.H., and K.I.B. designed the  
702 experiments. T.A., G.B., and C.A. performed the exhumation and radiological analysis of the  
703 mummy and provided a paleopathological examination. G.B. was responsible for the CT  
704 examinations together with imaging analysis and coordination of the calcification extraction.  
705 S.S. performed laboratory work. S.S., D.K., A.H., Å.J.V., and K.I.B. performed analyses.

706 **Acknowledgments**

707 The authors would like to thank Marta Burri for conducting the hybridization capture. We also  
708 thank Elizabeth A. Nelson for laboratory assistance, Maria Spyrou and Felix M. Key  
709 technical assistance, and all members of the Molecular Palaeopathology and Computational  
710 Pathogenomics research groups at the MPI-SHH for constructive comments throughout the  
711 study. We would like to acknowledge the Department of Imaging and Clinical Physiology,  
712 Skåne University Hospital Lund for the generous opportunity to examine the mummy of  
713 Peder Winstrup and the radiologists Roger Siemund, Pär Wingren, Mats Geijer, Pernilla



714 Gustavson and David Pellby for contributing to the image analyses. A sincere thank you to  
715 the thoracic surgeons Erik Gyllstedt and Jesper Andreasson for so delicately extracting the  
716 small calcification of interest and enabling further investigations.  
717

718 REFERENCES

- 719 1. WHO. WHO | Tuberculosis (TB) [Internet]. WHO. 2018 [cited 2018 Nov 18]. Available  
720 from: <http://www.who.int/tb/en/>
- 721 2. Houben RMGJ, Dodd PJ. The Global Burden of Latent Tuberculosis Infection: A Re-  
722 estimation Using Mathematical Modelling. *PLOS Medicine*. 2016 Oct  
723 25;13(10):e1002152.
- 724 3. Comas I, Coscolla M, Luo T, Borrell S, Holt KE, Kato-Maeda M, et al. Out-of-Africa  
725 migration and Neolithic coexpansion of *Mycobacterium tuberculosis* with modern  
726 humans. *Nat Genet*. 2013 Oct;45(10):1176–82.
- 727 4. Pepperell CS, Casto AM, Kitchen A, Granka JM, Cornejo OE, Holmes EC, et al. The  
728 Role of Selection in Shaping Diversity of Natural *M. tuberculosis* Populations. *PLOS*  
729 *Pathogens*. 2013 Aug 15;9(8):e1003543.
- 730 5. Bos KI, Harkins KM, Herbig A, Coscolla M, Weber N, Comas I, et al. Pre-Columbian  
731 mycobacterial genomes reveal seals as a source of New World human tuberculosis.  
732 *Nature*. 2014 Aug 20;514(7523):494–7.
- 733 6. Kay GL, Sergeant MJ, Zhou Z, Chan JZ-M, Millard A, Quick J, et al. Eighteenth-century  
734 genomes show that mixed infections were common at time of peak tuberculosis in  
735 Europe. *Nature Communications*. 2015 Apr 7;6:6717.
- 736 7. Baker O, Lee OY-C, Wu HHT, Besra GS, Minnikin DE, Llewellyn G, et al. Human  
737 tuberculosis predates domestication in ancient Syria. *Tuberculosis*. 2015 Jun 1;95:S4–  
738 12.
- 739 8. Hershkovitz I, Donoghue HD, Minnikin DE, Besra GS, Lee OY-C, Gernaey AM, et al.  
740 Detection and Molecular Characterization of 9000-Year-Old *Mycobacterium*  
741 *tuberculosis* from a Neolithic Settlement in the Eastern Mediterranean. Ahmed N,  
742 editor. *PLoS ONE*. 2008 Oct 15;3(10):e3426.
- 743 9. Masson M, Molnár E, Donoghue HD, Besra GS, Minnikin DE, Wu HHT, et al.  
744 Osteological and Biomolecular Evidence of a 7000-Year-Old Case of Hypertrophic  
745 Pulmonary Osteopathy Secondary to Tuberculosis from Neolithic Hungary. *PLOS ONE*.  
746 2013;8(10):e78252.
- 747 10. Rothschild BM, Martin L, Lev G, Bercovier H, Bar-Gal GK, Greenblatt CL, et al.  
748 *Mycobacterium tuberculosis* Complex DNA from an Extinct Bison Dated 17,000 Years  
749 before the Present. *Clinical Infectious Diseases*. 2001;(33):305–11.
- 750 11. Wilbur AK, Bouwman AS, Stone AC, Roberts CA, Pfister L-A, Buikstra JE, et al.  
751 Deficiencies and challenges in the study of ancient tuberculosis DNA. *Journal of*  
752 *Archaeological Science*. 2009 Sep;36(9):1990–7.
- 753 12. Gagneux S. Ecology and evolution of *Mycobacterium tuberculosis*. *Nature Reviews*  
754 *Microbiology*. 2018 Apr;16(4):202–13.
- 755 13. Ochman H, Elwyn S, Moran NA. Calibrating bacterial evolution. *PNAS*. 1999 Oct  
756 26;96(22):12638–43.

- 757 14. Warinner C, Herbig A, Mann A, Yates JAF, Weiß CL, Burbano HA, et al. A Robust  
758 Framework for Microbial Archaeology. *Annual Review of Genomics and Human*  
759 *Genetics*. 2017;18(1).
- 760 15. Leung AN, Müller NL, Pineda PR, FitzGerald JM. Primary tuberculosis in childhood:  
761 radiographic manifestations. *Radiology*. 1992 Jan;182(1):87–91.
- 762 16. Burrill J, Williams CJ, Bain G, Conder G, Hine AL, Misra RR. Tuberculosis: a radiologic  
763 review. *Radiographics*. 2007 Oct;27(5):1255–73.
- 764 17. Bahr NC, Antinori S, Wheat LJ, Sarosi GA. Histoplasmosis infections worldwide:  
765 thinking outside of the Ohio River valley. *Curr Trop Med Rep*. 2015 Jun 1;2(2):70–80.
- 766 18. Dabney J, Knapp M, Glocke I, Gansauge M-T, Weihmann A, Nickel B, et al. Complete  
767 mitochondrial genome sequence of a Middle Pleistocene cave bear reconstructed from  
768 ultrashort DNA fragments. *Proceedings of the National Academy of Sciences*. 2013  
769 Sep 24;110(39):15758–63.
- 770 19. Vågene ÅJ, Herbig A, Campana MG, García NMR, Warinner C, Sabin S, et al.  
771 *Salmonella enterica* genomes from victims of a major sixteenth-century epidemic in  
772 Mexico. *Nature Ecology & Evolution*. 2018 Jan 15;1.
- 773 20. Huson DH, Beier S, Flade I, Górská A, El-Hadidi M, Mitra S, et al. MEGAN Community  
774 Edition - Interactive Exploration and Analysis of Large-Scale Microbiome Sequencing  
775 Data. *PLoS Comput Biol*. 2016 Jun;12(6):e1004957.
- 776 21. Salanoubat M, Genin S, Artiguenave F, Gouzy J, Mangenot S, Arlat M, et al. Genome  
777 sequence of the plant pathogen *Ralstonia solanacearum*. *Nature*. 2002  
778 Jan;415(6871):497–502.
- 779 22. Mann AE, Sabin S, Ziesemer K, Vågene ÅJ, Schroeder H, Ozga AT, et al. Differential  
780 preservation of endogenous human and microbial DNA in dental calculus and dentin.  
781 *Scientific Reports*. 2018 Jun 29;8(1):9822.
- 782 23. Comas I, Chakravarti J, Small PM, Galagan J, Niemann S, Kremer K, et al. Human T  
783 cell epitopes of *Mycobacterium tuberculosis* are evolutionarily hyperconserved. *Nat*  
784 *Genet*. 2010 Jun;42(6):498–503.
- 785 24. Peltzer A, Jäger G, Herbig A, Seitz A, Kniep C, Krause J, et al. EAGER: efficient  
786 ancient genome reconstruction. *Genome Biology*. 2016;17:60.
- 787 25. Renaud G, Slon V, Duggan AT, Kelso J. Schmutzi: estimation of contamination and  
788 endogenous mitochondrial consensus calling for ancient DNA. *Genome Biology*.  
789 2015;16(1):1–18.
- 790 26. Dabney J, Meyer M, Pääbo S. Ancient DNA Damage. *Cold Spring Harb Perspect Biol*.  
791 2013 Jul 1;5(7):a012567.
- 792 27. Ginolhac A, Rasmussen M, Gilbert MTP, Willerslev E, Orlando L. mapDamage: testing  
793 for damage patterns in ancient DNA sequences. *Bioinformatics*. 2011 Aug  
794 1;27(15):2153–5.
- 795 28. Briggs AW, Stenzel U, Meyer M, Krause J, Kircher M, Pääbo S. Removal of  
796 deaminated cytosines and detection of in vivo methylation in ancient DNA. *Nucleic*  
797 *Acids Res*. 2010 Apr 1;38(6):e87–e87.

- 798 29. Hodges E, Rooks M, Xuan Z, Bhattacharjee A, Benjamin Gordon D, Brizuela L, et al.  
799 Hybrid selection of discrete genomic intervals on custom-designed microarrays for  
800 massively parallel sequencing. *Nat Protocols*. 2009 May;4(6):960–74.
- 801 30. Fu Q, Meyer M, Gao X, Stenzel U, Burbano HA, Kelso J, et al. DNA analysis of an  
802 early modern human from Tianyuan Cave, China. *PNAS*. 2013 Feb 5;110(6):2223–7.
- 803 31. Stucki D, Brites D, Jeljeli L, Coscolla M, Liu Q, Trauner A, et al. Mycobacterium  
804 tuberculosis lineage 4 comprises globally distributed and geographically restricted  
805 sublineages. *Nat Genet*. 2016 Oct 31;48:1535–43.
- 806 32. Coll F, McNERney R, Guerra-Assunção JA, Glynn JR, Perdigão J, Viveiros M, et al. A  
807 robust SNP barcode for typing Mycobacterium tuberculosis complex strains. *Nature*  
808 *Communications*. 2014 Sep 1;5:4812.
- 809 33. Li H, Durbin R. Fast and accurate short read alignment with Burrows-Wheeler  
810 transform. *Bioinformatics*. 2009 Jul 15;25(14):1754–60.
- 811 34. Didelot X, Wilson DJ. ClonalFrameML: Efficient Inference of Recombination in Whole  
812 Bacterial Genomes. *PLOS Computational Biology*. 2015 Feb 12;11(2):e1004041.
- 813 35. Boritsch EC, Khanna V, Pawlik A, Honoré N, Navas VH, Ma L, et al. Key experimental  
814 evidence of chromosomal DNA transfer among selected tuberculosis-causing  
815 mycobacteria. *PNAS*. 2016 Aug 15;201604921.
- 816 36. Bouckaert R, Heled J, Kühnert D, Vaughan T, Wu C-H, Xie D, et al. BEAST 2: A  
817 Software Platform for Bayesian Evolutionary Analysis. *PLOS Computational Biology*.  
818 2014 Apr 10;10(4):e1003537.
- 819 37. O'Neill MB, Shockey AC, Zarley A, Aylward W, Eldholm V, Kitchen A, et al. Lineage  
820 specific histories of Mycobacterium tuberculosis dispersal in Africa and Eurasia.  
821 *bioRxiv*. 2018 Jul 6;210161.
- 822 38. Cingolani P, Platts A, Wang LL, Coon M, Nguyen T, Wang L, et al. A program for  
823 annotating and predicting the effects of single nucleotide polymorphisms, SnpEff. *Fly*.  
824 2012 Apr 1;6(2):80–92.
- 825 39. Wirth T, Hildebrand F, Allix-Béguec C, Wölbeling F, Kubica T, Kremer K, et al. Origin,  
826 Spread and Demography of the Mycobacterium tuberculosis Complex. *PLOS*  
827 *Pathogens*. 2008 Sep 26;4(9):e1000160.
- 828 40. Hershberg R, Lipatov M, Small PM, Sheffer H, Niemann S, Homolka S, et al. High  
829 Functional Diversity in Mycobacterium tuberculosis Driven by Genetic Drift and Human  
830 Demography. *PLOS Biology*. 2008 Dec 16;6(12):e311.
- 831 41. Gutierrez MC, Brisse S, Brosch R, Fabre M, Omais B, Marmiesse M, et al. Ancient  
832 Origin and Gene Mosaicism of the Progenitor of Mycobacterium tuberculosis. *PLOS*  
833 *Pathogens*. 2005 Aug 19;1(1):e5.
- 834 42. Shillington K. *History of Africa*. Third. New York: Palgrave MacMillan; 2012.
- 835 43. Cohen MN, Armelagos GJ. *Paleopathology at the Origins of Agriculture*. Gainesville,  
836 Florida: University Press of Florida; 1984.

- 837 44. Armelagos GJ, Brown PJ, Turner B. Evolutionary, historical and political economic  
838 perspectives on health and disease. *Social Science & Medicine*. 2005 Aug;61(4):755–  
839 65.
- 840 45. Roberts CA, Buikstra JE. *The Bioarchaeology of Tuberculosis: A Global View on a*  
841 *Reemerging Disease*. Gainesville, Florida: University Press of Florida; 2003.
- 842 46. Canci A, Minozzi S, Tarli SMB. New Evidence of Tuberculous Spondylitis from Neolithic  
843 Liguria (Italy). *International Journal of Osteoarchaeology*. 1996 Dec 1;6(5):497–501.
- 844 47. El-Najjar M, Al-Shiyab A, Al-Sarie I. Cases of tuberculosis at 'Ain Ghazal, Jordan.  
845 *Paléorient*. 1996;22(2):123–8.
- 846 48. Formicola V, Milanese Q, Scarsini C. Evidence of spinal tuberculosis at the beginning of  
847 the fourth millennium BC from Arene Candide cave (Liguria, Italy). *American Journal of*  
848 *Physical Anthropology*. 1987 Jan 1;72(1):1–6.
- 849 49. Köhler K, Pálfi G, Molnár E, Zalai-Gaál I, Oszás A, Bánffy E, et al. A Late Neolithic  
850 Case of Pott's Disease from Hungary. *International Journal of Osteoarchaeology*. 2014  
851 Nov 1;24(6):697–703.
- 852 50. Sparacello VS, Roberts CA, Kerudin A, Müller R. A 6500-year-old Middle Neolithic child  
853 from Pollera Cave (Liguria, Italy) with probable multifocal osteoarticular tuberculosis.  
854 *International Journal of Paleopathology* [Internet]. 2017 Feb [cited 2017 Feb 13];  
855 Available from: <http://linkinghub.elsevier.com/retrieve/pii/S1879981716300900>
- 856 51. Ho SYW, Phillips MJ, Cooper A, Drummond AJ. Time Dependency of Molecular Rate  
857 Estimates and Systematic Overestimation of Recent Divergence Times. *Mol Biol Evol*.  
858 2005 Jul 1;22(7):1561–8.
- 859 52. Ho SYW, Larson G. Molecular clocks: when times are a-changin'. *Trends in Genetics*.  
860 2006 Feb;22(2):79–83.
- 861 53. Ho SYW, Shapiro B, Phillips MJ, Cooper A, Drummond AJ. Evidence for Time  
862 Dependency of Molecular Rate Estimates. *Syst Biol*. 2007 Jun 1;56(3):515–22.
- 863 54. Achtman M. How old are bacterial pathogens? *Proc R Soc B*. 2016 Aug  
864 17;283(1836):20160990.
- 865 55. Duchêne S, Holmes EC, Ho SYW. Analyses of evolutionary dynamics in viruses are  
866 hindered by a time-dependent bias in rate estimates. *Proc R Soc B*. 2014 Jul  
867 7;281(1786):20140732.
- 868 56. Drummond AJ, Pybus OG, Rambaut A, Forsberg R, Rodrigo AG. Measurably evolving  
869 populations. *Trends in Ecology & Evolution*. 2003 Sep;18(9):481–8.
- 870 57. Drummond AJ, Ho SYW, Phillips MJ, Rambaut A. Relaxed Phylogenetics and Dating  
871 with Confidence. *PLOS Biology*. 2006 Mar 14;4(5):e88.
- 872 58. Brynildsrud OB, Pepperell CS, Suffys P, Grandjean L, Monteserin J, Debech N, et al.  
873 Global expansion of *Mycobacterium tuberculosis* lineage 4 shaped by colonial  
874 migration and local adaptation. *Science Advances*. 2018 Oct 1;4(10):eaat5869.

- 875 59. Ford CB, Lin PL, Chase MR, Shah RR, Iartchouk O, Galagan J, et al. Use of whole  
876 genome sequencing to estimate the mutation rate of *Mycobacterium tuberculosis*  
877 during latent infection. *Nature Genetics*. 2011 May;43(5):482–6.
- 878 60. Kumar S, Stecher G, Peterson D, Tamura K. MEGA-CC: computing core of molecular  
879 evolutionary genetics analysis program for automated and iterative data analysis.  
880 *Bioinformatics*. 2012 Oct 15;28(20):2685–6.
- 881 61. Liu Q, Ma A, Wei L, Pang Y, Wu B, Luo T, et al. China's tuberculosis epidemic stems  
882 from historical expansion of four strains of *Mycobacterium tuberculosis*. *Nature Ecology*  
883 & *Evolution*. 2018 Nov 5;1.
- 884 62. Dubos R, Dubos J. *The White Plague: Tuberculosis, Man, and Society*. 3rd ed. New  
885 Brunswick, New Jersey: Rutgers University Press; 1952.
- 886 63. Kühnert D, Coscolla M, Brites D, Stucki D, Metcalfe J, Fenner L, et al. Tuberculosis  
887 outbreak investigation using phylodynamic analysis. *Epidemics*. 2018 Dec 1;25:47–53.
- 888 64. Stadler T, Kühnert D, Bonhoeffer S, Drummond AJ. Birth–death skyline plot reveals  
889 temporal changes of epidemic spread in HIV and hepatitis C virus (HCV). *PNAS*. 2013  
890 Jan 2;110(1):228–33.
- 891 65. Boskova V, Stadler T, Magnus C. The influence of phylodynamic model specifications  
892 on parameter estimates of the Zika virus epidemic. *Virus Evol* [Internet]. 2018 Jan 1  
893 [cited 2018 Nov 2];4(1). Available from:  
894 <https://academic.oup.com/ve/article/4/1/vex044/4829709>
- 895 66. Möller S, Plessis L du, Stadler T. Impact of the tree prior on estimating clock rates  
896 during epidemic outbreaks. *PNAS*. 2018 Mar 28;201713314.
- 897 67. Jankute M, Nataraj V, Lee OY-C, Wu HHT, Ridell M, Garton NJ, et al. The role of  
898 hydrophobicity in tuberculosis evolution and pathogenicity. *Scientific Reports*. 2017  
899 May 2;7(1):1315.
- 900 68. Sreevatsan S, Pan X, Stockbauer KE, Connell ND, Kreiswirth BN, Whittam TS, et al.  
901 Restricted structural gene polymorphism in the *Mycobacterium tuberculosis* complex  
902 indicates evolutionarily recent global dissemination. *PNAS*. 1997 Sep 2;94(18):9869–  
903 74.
- 904 69. Gansauge M-T, Gerber T, Glocke I, Korlević P, Lippik L, Nagel S, et al. Single-stranded  
905 DNA library preparation from highly degraded DNA using T4 DNA ligase. *Nucleic Acids*  
906 *Res*. 2017 Jun 2;45(10):e79–e79.
- 907 70. Andrades Valtueña A, Mittnik A, Key FM, Haak W, Allmäe R, Belinskij A, et al. The  
908 Stone Age Plague and Its Persistence in Eurasia. *Current Biology* [Internet]. 2017 Nov  
909 22 [cited 2017 Nov 30]; Available from:  
910 <http://www.sciencedirect.com/science/article/pii/S0960982217313283>
- 911 71. Rasmussen S, Allentoft ME, Nielsen K, Orlando L, Sikora M, Sjögren K-G, et al. Early  
912 Divergent Strains of *Yersinia pestis* in Eurasia 5,000 Years Ago. *Cell*. 2015 Oct  
913 22;163(3):571–82.
- 914 72. Spyrou MA, Tikhbatova RI, Wang C-C, Valtueña AA, Lankapalli AK, Kondrashin VV, et  
915 al. Analysis of 3800-year-old *Yersinia pestis* genomes suggests Bronze Age origin for  
916 bubonic plague. *Nature Communications*. 2018 Jun 8;9(1):2234.



- 917 73. Loosdrecht M van de, Bouzouggar A, Humphrey L, Posth C, Barton N, Aximu-Petri A,  
918 et al. Pleistocene North African genomes link Near Eastern and sub-Saharan African  
919 human populations. *Science*. 2018 May 4;360(6388):548–52.
- 920 74. Schuenemann VJ, Peltzer A, Welte B, van Pelt WP, Molak M, Wang C-C, et al. Ancient  
921 Egyptian mummy genomes suggest an increase of Sub-Saharan African ancestry in  
922 post-Roman periods. *Nature Communications*. 2017 May 30;8:15694.
- 923 75. Meyer M, Kircher M. Illumina Sequencing Library Preparation for Highly Multiplexed  
924 Target Capture and Sequencing. *Cold Spring Harbor Protocols*. 2010 Jun  
925 1;2010(6):pdb.prot5448-pdb.prot5448.
- 926 76. Kircher M, Sawyer S, Meyer M. Double indexing overcomes inaccuracies in multiplex  
927 sequencing on the Illumina platform. *Nucleic Acids Research*. 2012 Jan 1;40(1):e3–e3.
- 928 77. Neukamm J, Peltzer A. Integrative-Transcriptomics/DamageProfiler [Internet]. 2018.  
929 Available from: <http://doi.org/10.5281/zenodo.1291355>
- 930 78. Auwera GAV der, Carneiro MO, Hartl C, Poplin R, Angel G del, Levy-Moonshine A, et  
931 al. From FastQ Data to High-Confidence Variant Calls: The Genome Analysis Toolkit  
932 Best Practices Pipeline. *Current Protocols in Bioinformatics*. 2013 Oct 1;43(1):11.10.1-  
933 11.10.33.
- 934 79. Stamatakis A. RAxML version 8: a tool for phylogenetic analysis and post-analysis of  
935 large phylogenies. *Bioinformatics*. 2014 May 1;30(9):1312–3.
- 936 80. Rambaut A, Lam TT, Max Carvalho L, Pybus OG. Exploring the temporal structure of  
937 heterochronous sequences using TempEst (formerly Path-O-Gen). *Virus Evol*  
938 [Internet]. 2016 Jan 1 [cited 2017 Nov 30];2(1). Available from:  
939 <https://academic.oup.com/ve/article/2/1/vew007/1753488>
- 940 81. Keane T, Creevey C, Pentony M, Naughton TJ, McInerney J. Assessment of methods  
941 for amino acid matrix selection and their use on empirical data shows that ad hoc  
942 assumptions for choice of matrix are not justified. *BMC evolutionary biology*.  
943 2006;6:29–46.
- 944 82. Rambaut A, Suchard M, Xie W, Drummond AJ. Tracer. Insittute of Evolutionary  
945 Biology, University of Edinburgh; 2014.
- 946
- 947



948 ADDITIONAL FILES

949 **Additional File 1**

950 Format: Excel spreadsheet (.xlsx)

951 Title: Supplementary Tables

952 Description: Large tables of data contributing to the analyses presented in this paper,  
953 including a taxon table showing assigned reads from all taxonomic levels represented in the  
954 metagenomic LUND1 library (Table S1); full EAGER pipeline results for LUND1 shotgun  
955 sequencing data when mapped to HG19 human reference genome and TB ancestor  
956 genome, the non-UDG-treated enriched LUND1 data when mapped to the TB ancestor  
957 genome, and the UDG-treated enriched LUND1 data when mapped to the TB ancestor  
958 genome (Table S2); full EAGER pipeline results for negative controls processed with  
959 LUND1, mapped to the reconstructed TB ancestor genome (Table S3); genomes included in  
960 the full MTBC dataset, with respective publications, accession numbers, lineages, and dates  
961 (when applicable) (Table S4); genomes included in the L4 dataset, with respective  
962 publications, accession numbers, lineages, dates, and percentage of total SNPs called as  
963 heterozygous (Table S5); sites excluded from the full MTBC dataset (Table S6); sites  
964 excluded from the L4 dataset (Table S7); SnpEff annotation for derived alleles in LUND1  
965 (Table S8).

966 **Additional File 2**

967 Format: Word document (.docx)

968 Title: Supplementary Information

969 Description: Detailed supplements to the RESULTS and METHODS sections,  
970 including supplementary figures.

971
